# Supplementary material for: Hypomorphic Brca2 and Rad51c double mutant mice display Fanconi anemia, cancer and polygenic replication stress
Source: PubMed Central journal article supplement (PMC10008622; doi:10.1038/s41467-023-36933-y), 2023-03-11
Supplement: 41467_2023_36933_MOESM1_ESM.pdf [file 41467_2023_36933_MOESM1_ESM.pdf]

**a** You have run SYMPRED using the Dynamic Programming strategy with no weighting.

# SEQUENCE NAME: NP\_001278369.1DNArepairproteinRAD51homolog3isoform1[Musmusculus]  
# SEQUENCE LENGTH: 384

|                 |                                                                         |
|-----------------|-------------------------------------------------------------------------|
| <b>Ruler</b>    | .....11.....21.....31.....41.....51.....61.....                         |
| <b>Sequence</b> | MLYRVHLAWLPSRLRPLFLFLCSLSGYIRNVTRTSETRRQPYMKPVCGISSAARPVQVIGSKEEALETL   |
| <b>PROF</b>     | EEEEEE HHHHHHHH HHHHHHHHHHHH EEEE HHH HHHHHHHH HH                       |
| <b>SSPRO</b>    | EEEEH HHHHHH HHHHHHHHHHHH HHH HHHHHHHHHHHH                              |
| <b>YASPIN</b>   | EEEEEEEE EEEEE HHH EEEEEEE HHHHHHHH HHHHHHHH                            |
| <b>PSIPRED</b>  | EEEEEEEE HHHHHHHHHHHH HHHHHHHHHHHH HHH HH HHHHHHHH                      |
| <b>SYMPRED</b>  | EEEEEE HHHHHH HHHHHHHHHHHHEE HHH HHH HHHHHHHHHH                         |
| <b>Ruler</b>    | .....81.....91.....101.....111.....121.....131.....                     |
| <b>Sequence</b> | QILRRECLTNKPRCAGTSVANEKCTALELLEQEHQTGGFIITFCSALDNILGGGIPLMKTTEVCGVPGVK  |
| <b>PROF</b>     | HHHHHHHHHHHHHHHHH HHHHHHHH EEEE HHHHHHHH HHHH                           |
| <b>SSPRO</b>    | HHHHHHHHHHHHHHHHH HHHHHHHHHHHH HHHHHHHH EEEEE                           |
| <b>YASPIN</b>   | HHHHHHHHHHHHHHHHH HHHHHHHH EEEE HHHHHHHH EEEEE HH                       |
| <b>PSIPRED</b>  | HHHHHHHHH HHHHHHHH HHHHHHHHHH HHHHHHHH EEEEE HH                         |
| <b>SYMPRED</b>  | HHHHHHHHHHHHHHHHH HHHHHHHH EEE HHHHHHHH EEEEE                           |
| <b>Ruler</b>    | .....151.....161.....171.....181.....191.....201.....                   |
| <b>Sequence</b> | TQLCMQLAVDVQIPECFGVGAGEAVFIDTEGSFMVDRVVSALATACIQHLHLIAGTHTHEEHQKALKDFTL |
| <b>PROF</b>     | EEEEEEEEEEEE EEEEE HHHHHHHHHHHHHHHHHH HHHHHHHH H                        |
| <b>SSPRO</b>    | EEEEEEEEEEEE H EEEEE HHHHHHHHHHHHHHHHHH HHHHHHHH H                      |
| <b>YASPIN</b>   | HHHHHHHHHHHHH EEEEE HHHHHHHHHHHHHHHHHH HHHHHHHH H                       |
| <b>PSIPRED</b>  | HHHHHHHHHHH HHHHHH EEEEE HHHHHHHHHHHHHHHH HHHHHHHH H                    |
| <b>SYMPRED</b>  | HHHHHHHHHHHHH EEEEE HHHHHHHHHHHHHHHHHH HHHHHHHH H                       |
| <b>Ruler</b>    | .....221.....231.....241.....251.....261.....271.....                   |
| <b>Sequence</b> | ENILSHIYFRCNDYTELLAQVYLLPDFLSDHPKVLVIIDGIAFPFRHDLEDLSRRLLSAQQMIS        |
| <b>PROF</b>     | HHHHHHHHHHH HHHHHHHHHHHHHH EEEEE HHHH HHHHHHHHHHHHHHHH                  |
| <b>SSPRO</b>    | HHHHHHHHHHH HHHHHHHHHHHHHH EEEEEHHHHHHHHHHHHHHHHHHHHH                   |
| <b>YASPIN</b>   | HHHH EEEEE HHHHHHHHHHHHHHHH EEEEE HHHHHHHH HHHHHHHHHHHHHH               |
| <b>PSIPRED</b>  | HHH EEEE HHHHHHHHHHHHHHHH EEEE HHHHHHHH HHHHHHHHHHHHHH                  |
| <b>SYMPRED</b>  | HHHHHHHEEH HHHHHHHHHHHHHHHH EEEEE HHHHHHHH HHHHHHHHHHHHHH               |
| <b>Ruler</b>    | .....291.....301.....311.....321.....331.....341.....                   |
| <b>Sequence</b> | LANNHRLAVILTNQMTTKIDKNQALLVPALGESWGHAAATIRLIFHWQKQRFATLYKSPSQKESTIPFQI  |
| <b>PROF</b>     | HHH EEEEE EEE HHHHHHEEEEE EEEEE EEEEE EEEEE                             |
| <b>SSPRO</b>    | HHH EEEEE EEEE EEE HHEEEEE EEEEE EEEEE                                  |
| <b>YASPIN</b>   | HHH EEEEEEEEE EEE HHH EEEEE EEEEE EEEEE                                 |
| <b>PSIPRED</b>  | HHH EEEE EEE HHHHHHH EEEEE EEEEE EEEEE                                  |
| <b>SYMPRED</b>  | HHH EEEEEEEEE HHH EEEEE EEEEE EEEEE                                     |
| <b>Ruler</b>    | .....361.....371.....381.....                                           |
| <b>Sequence</b> | TPQGFRDAVVTAASSQTTESSLNFRKRSREPEEE                                      |
| <b>PROF</b>     |                                                                         |
| <b>SSPRO</b>    | H                                                                       |
| <b>YASPIN</b>   | HHH                                                                     |
| <b>PSIPRED</b>  | EEEE HHH                                                                |
| <b>SYMPRED</b>  |                                                                         |

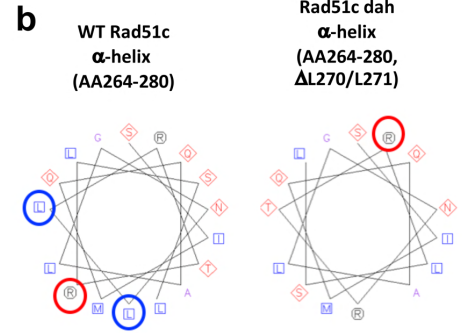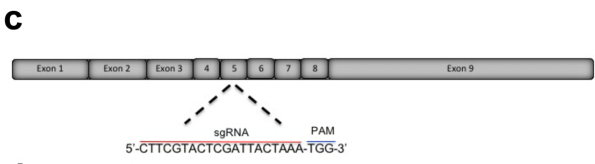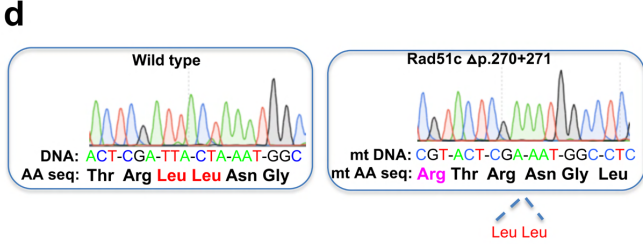

**e**

**NP\_001278369.1 DNA repair protein RAD51 homolog 3 isoform 1 [Mus musculus]**  
Sequence ID: Query\_58491 Length: 384 Number of Matches: 1

Range 1: 58 to 383 [Graphics](#) [Next Match](#) [Previous](#)

| Score          | Expect                                                        | Method                    | Identities   | Positives    | Gaps      |
|----------------|---------------------------------------------------------------|---------------------------|--------------|--------------|-----------|
| 591 bits(1524) | 0.0                                                           | Compositional matrix adj. | 284/327(87%) | 306/327(93%) | 1/327(0%) |
| Query 49       | EVGISKAELTQLIIRRECLTNKPRYAGTSESHKCTALELLEQEHQTGGFIITFCSALD    | 108                       |              |              |           |
| Sbjct 58       | +VGISK EALETQLI+RRECLTNKPR AGTS +++KCTALELLEQEHQTGGFIITFCSALD | 117                       |              |              |           |
| Query 109      | DILGGVPLMKTTEICGAPGVGKTLQCMQLAVDVQIPECFGVGAGEAVFIDTEGSFMVDR   | 168                       |              |              |           |
| Sbjct 118      | +ILGGG+PLMKTTE+CG PGVGTQLCMQLAVDVQIPECFGVGAGEAVFIDTEGSFMVDR   | 177                       |              |              |           |
| Query 169      | VVDLATACIQHLIAEKHKKEEHRKALEDFLTDNLISHIYFRCRDYTELLAQVYLLPD     | 228                       |              |              |           |
| Sbjct 178      | VV LATACIQHL LIA H EEH+KAL+DFTL+NILSHIYFRC DYTELLAQVYLLPD     | 237                       |              |              |           |
| Query 229      | FLSEHSKVLVVDGIAFPFRHDLDLSLRLRLNGLAQQMISLANNHRLAVILTNQMTT      | 288                       |              |              |           |
| Sbjct 238      | FLS+H KV+LVI+DGIAPFRHDL+DLSLRLRLNGLAQQMISLANNHRLAVILTNQMTT    | 297                       |              |              |           |
| Query 289      | KIDRNQALLVPALGESWGHAAATIRLIFHWDRKORLATLYKSPSQKECTVLFQIKPQGRD  | 348                       |              |              |           |
| Sbjct 298      | KIDRNQALLVPALGESWGHAAATIRLIFHWDRKORLATLYKSPSQKECTVLFQIKPQGRD  | 357                       |              |              |           |
| Query 349      | TVVTSACSLQTEGSLSTRKRSRDPREE VVT+A S QTE SL+ RKRSR+PEEE        | 375                       |              |              |           |
| Sbjct 358      | AVVTAASS-QTESSLNFRKRSREPEEE 383                               |                           |              |              |           |

Supplementary Fig.1. Generation of Rad51c mutant mice with 6bp deletion.

**a**, Schematic diagram of sgRNA guide and targeting sites in the mouse *Rad51c* locus.

PAM = protospacer adjacent motif.

**b**, wheel projection of alpha helix amino acids 264-280 of murine Rad51c (left), and wheel projection of the same alpha helix in the Rad51c dah mutant missing L270/L271.

**c**, Sanger sequencing of PCR products encompassing the *Rad51c* targeting region from a representative wild-type (WT) mice and *Rad51c<sup>dah/dah</sup>* mouse. The two leucine residues that are deleted in *Rad51c<sup>dah/dah</sup>* mouse are marked in red, the adjacent Arginine that is substituted by a histidine in the FANCO patient is marked in magenta.

**d**, Blast sequence alignment of human (NP\_478123.1) and murine RAD51C (NP\_001278369) shows high similarity and evolutionary conservation.

**e**, SympRED protein secondary structure prediction of RAD51C showing R258 (blue square, mutated to histidine in the FANCO patient) adjacent to the two leucines (red square) that are deleted in the mouse model within the same a-helix

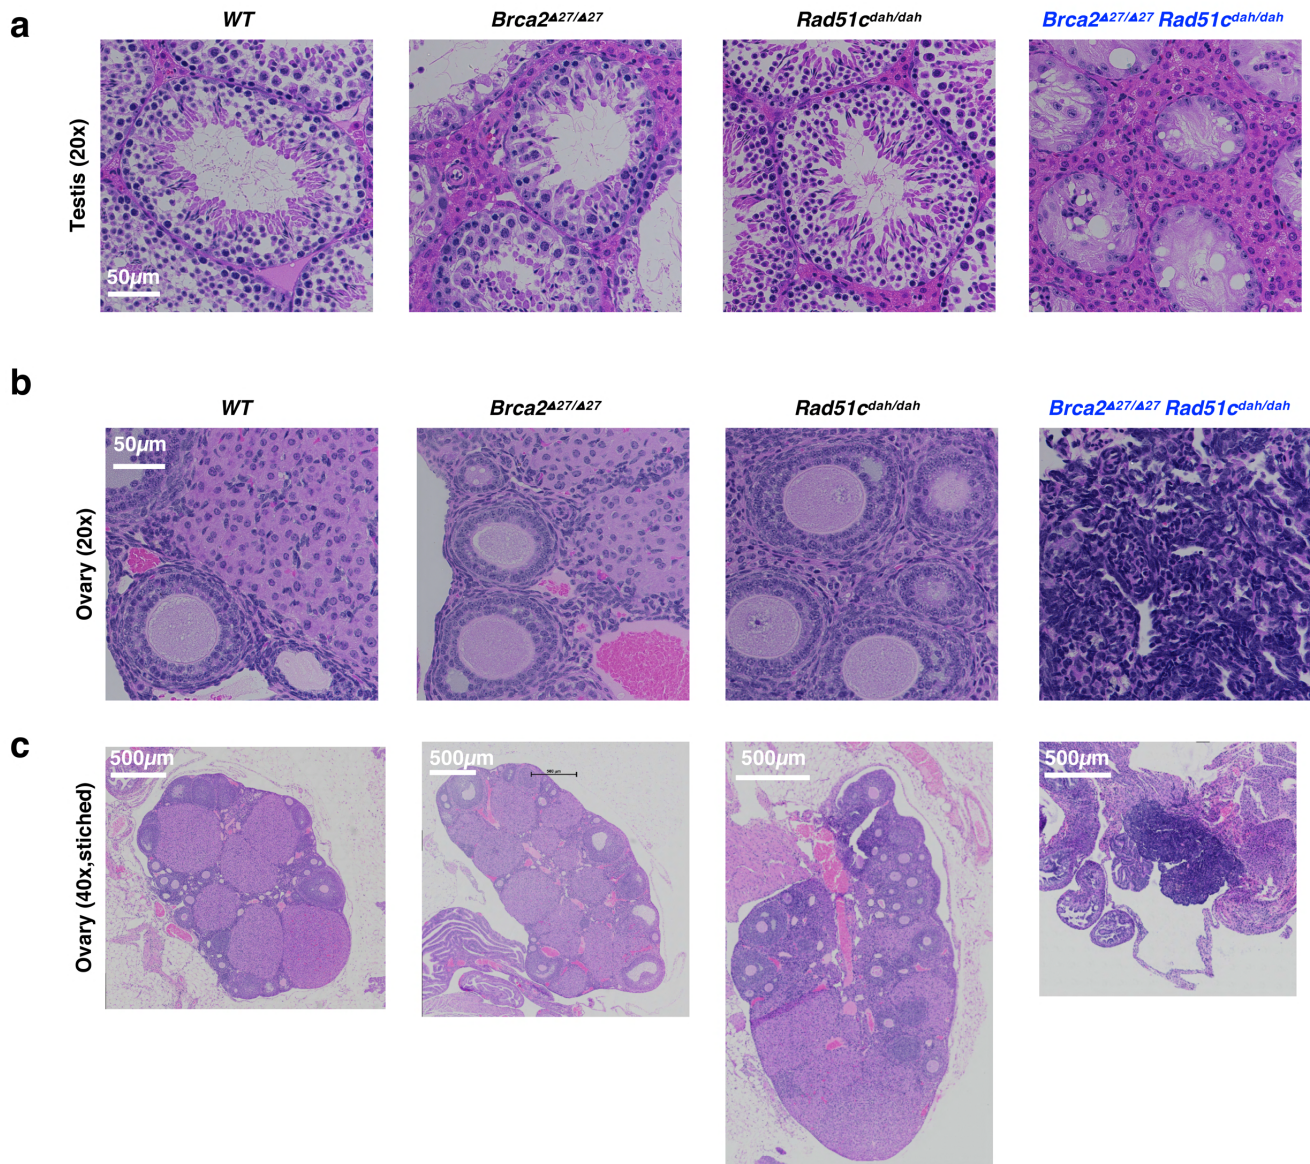

**Supplementary Fig.2. Polygenic mutant FANC mice show impaired gonad development.**

**a**, Representative images of hematoxylin and eosin (H&E)-stained tissue cross-sections of testis from animals with indicated genotypes at 8-12 weeks. Seminiferous tubuli of *Brca2*<sup>Δ27/Δ27</sup> mice can show decreased spermatocytes (arrow), while those of *Brca2*<sup>Δ27/Δ27</sup> + *Rad51c*<sup>dah/dah</sup> mice show a Sertoli cell only phenotype with a complete loss in spermatocytes and spermatogonia. Scale bars indicate 50 μm. Similar results were obtained by analyzing three independent tissues of each genotype.

**b-c**, Representative images of H&E-stained tissue cross-sections of ovaries from animals with indicated genotypes at 12 weeks. Scale bars indicate 50 μm **b**, and 500 μm **c**. Similar results were obtained by analyzing three independent tissues of each genotype.

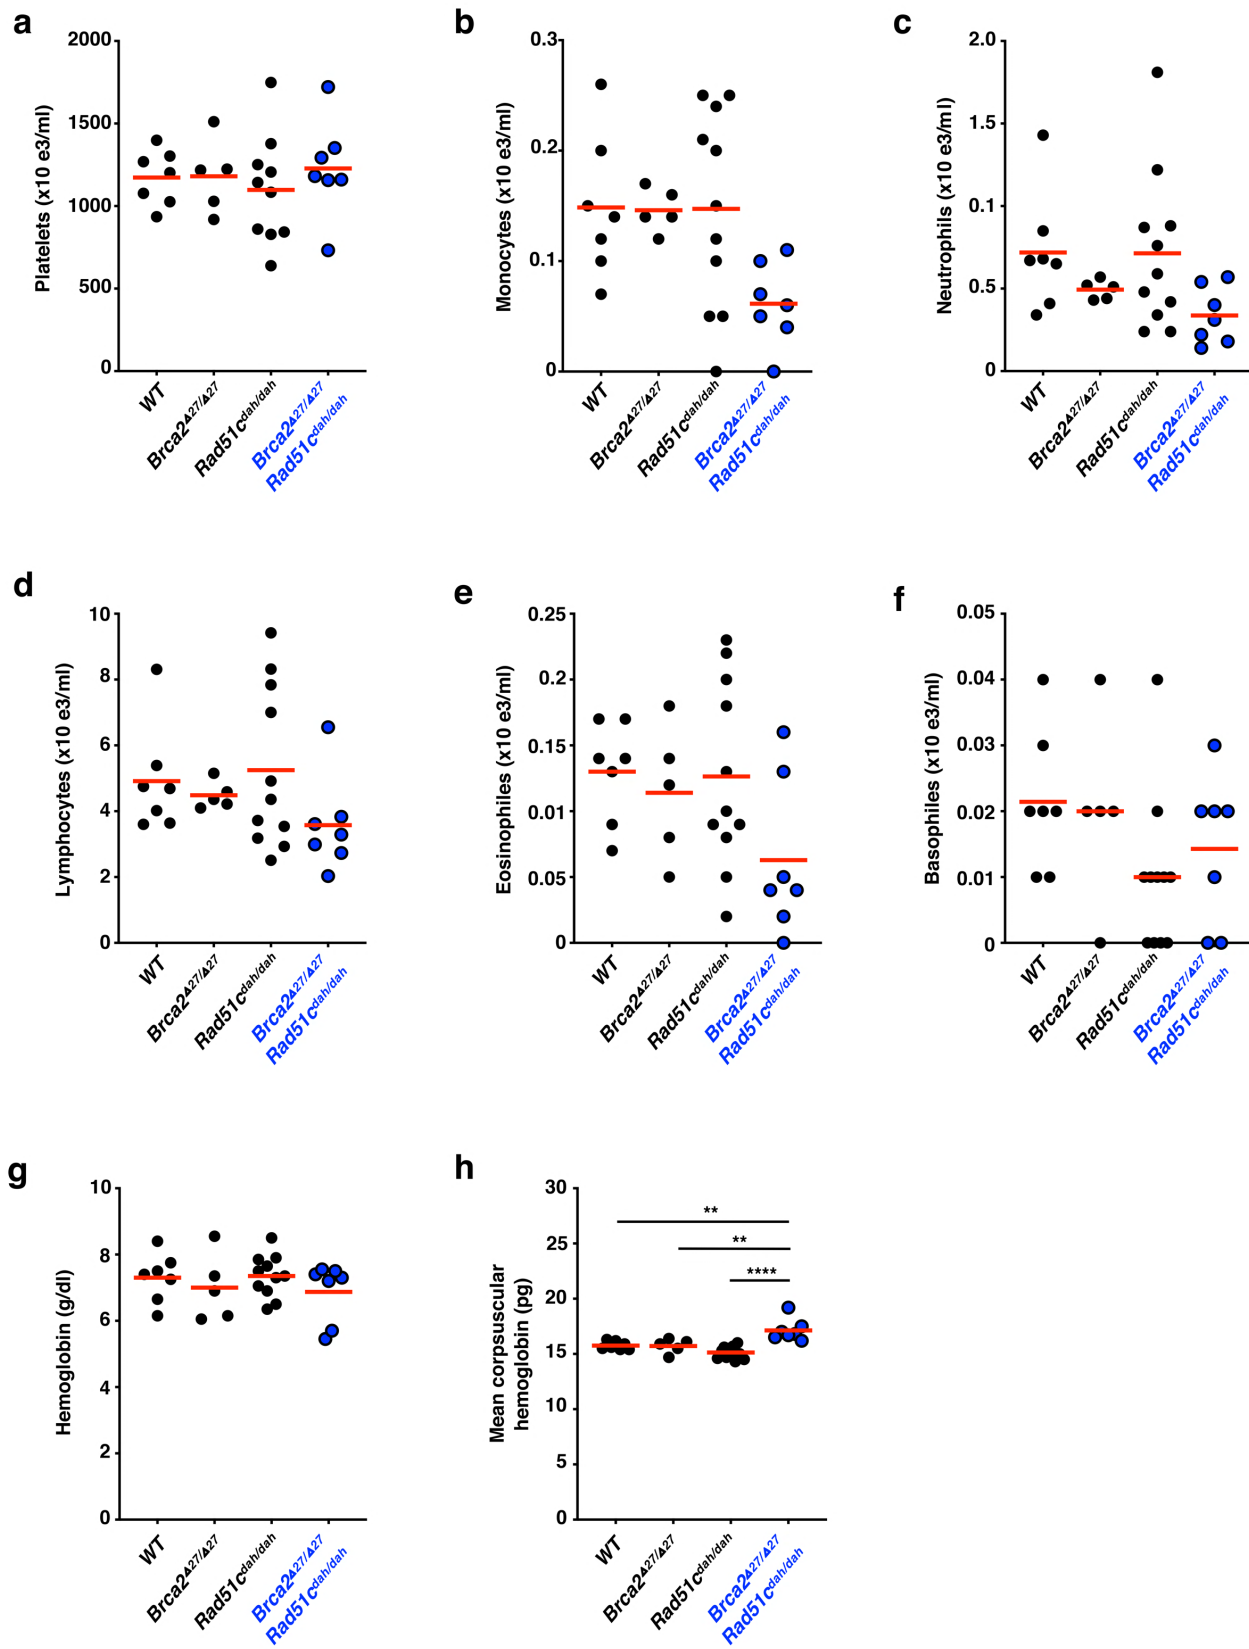

Supplementary Fig.3. Complete blood count analysis of *Brca2*<sup>Δ27/Δ27</sup> + *Rad51c*<sup>dah/dah</sup> mice.

**a-h**, Complete blood count analysis of 8–12 weeks old *Brca2* <sup>$\Delta 27/\Delta 27$</sup>  + *Rad51c*<sup>*dah/dah*</sup> and control mice. Data represent biologically independent samples for wild-type (n=7), *Brca2* <sup>$\Delta 27/\Delta 27$</sup>  (n=5), *Rad51c*<sup>*dah/dah*</sup> (n=11, except a, platelet count only contain n=10) and *Brca2* <sup>$\Delta 27/\Delta 27$</sup>  + *Rad51c*<sup>*dah/dah*</sup> (n=7) mice.

**a**, Platelet count.

**b**, Monocyte count.

**c**, Neutrophils count.

**d**, Lymphocytes count.

**e**, Eosinophil count.

**f**, Basophil count.

**g**, Hemoglobin concentrations.

**h**, Mean corpuscular hemoglobin concentration. *Brca2* <sup>$\Delta 27/\Delta 27$</sup>  + *Rad51c*<sup>*dah/dah*</sup> against WT: p=0.0026; *Brca2* <sup>$\Delta 27/\Delta 27$</sup>  + *Rad51c*<sup>*dah/dah*</sup> against *Brca2* <sup>$\Delta 27/\Delta 27$</sup> : p=0.0053; ; *Brca2* <sup>$\Delta 27/\Delta 27$</sup>  + *Rad51c*<sup>*dah/dah*</sup> against *Rad51c*<sup>*dah/dah*</sup>: p<0.0001.

Red bar in scatter graphs represent the mean. *p*-values are derived using the one-way ANOVA test. \*\* *p* < 0.01, \*\*\*\* *p* < 0.0001.

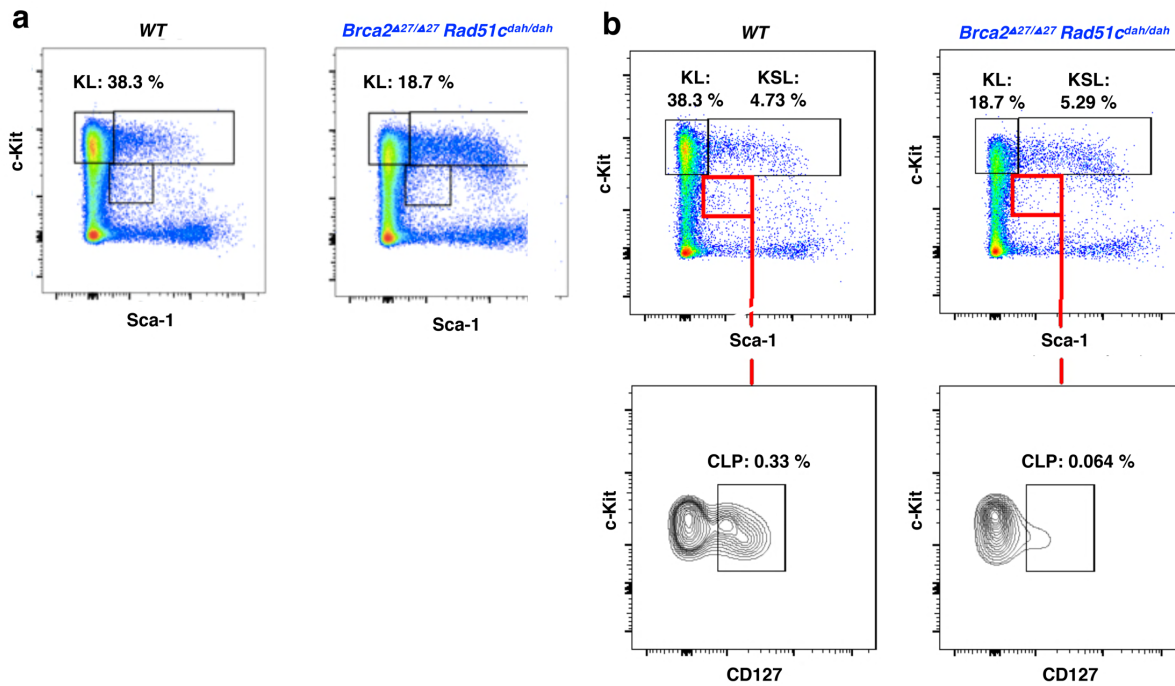

**Supplementary Fig.4. Hematological FACS analysis of *Brca2*<sup>Δ27/Δ27</sup> +*Rad51*<sup>c<sup>dah/dah</sup></sup> mice.**

**a**, Representative FACS plot showing gating for hematological lineage analysis performed for bone marrow cells collected from 8-12 weeks old mice with indicated genotypes (n=5-6). Lineage negative cells (20,000 events) are gated for CD117 (c-Kit) positive and Sca-1 negative populations to identify the KL subset designating myeloid progenitor cells.

**b**, Representative FACS plot showing gating for identification of the CLP subset, designating common lymphoid progenitors. Lineage negative cells (20,000 events) are gated for c-Kit positive and Sca-1 moderate expression (KSL), which is further gated for CD127 positive cells to identify the CLP subpopulation designating the lymphoid population.

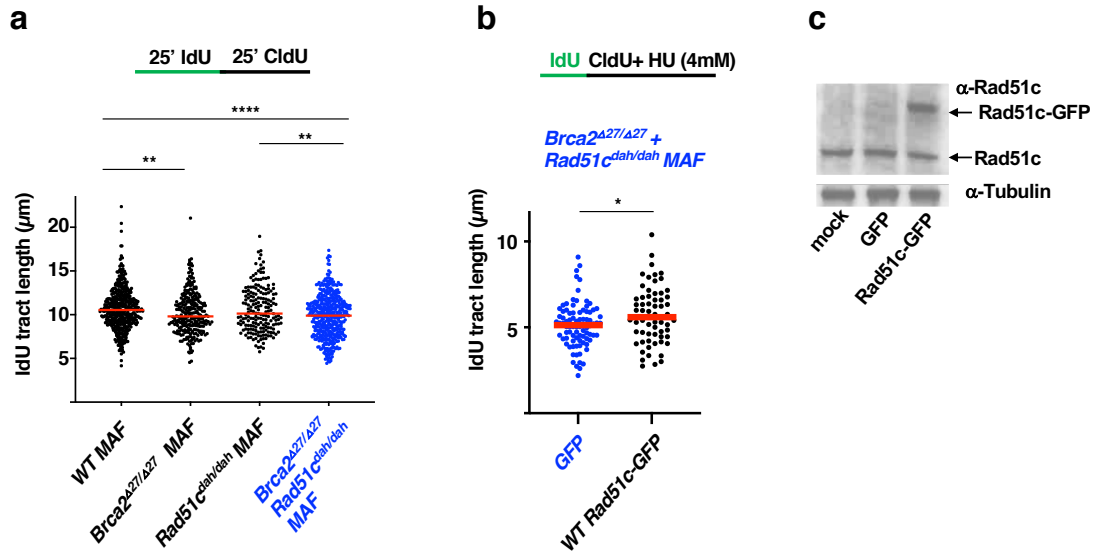

**Extended Data Fig. 5. Cells with polygenic *FANC* mutations show reduced DNA replication speeds.**

**a**, Scatter plot of DNA fiber analysis of nascent IdU tract lengths incorporated without external replication stalling, measuring DNA replication progression. Data represent biologically independent fiber experiments from wild-type ( $n=5$ ), *Brca2* <sup>$\Delta 27/\Delta 27$</sup>  ( $n=4$ ), *Rad51c*<sup>*dah/dah*</sup> ( $n=2$ ) and *Brca2* <sup>$\Delta 27/\Delta 27$</sup>  + *Rad51c*<sup>*dah/dah*</sup> ( $n=4$ ) mouse embryonic fibroblasts (MAF). In total, analysis was performed for wild-type ( $n_{\text{fibers}}=469$ ), *Brca2* <sup>$\Delta 27/\Delta 27$</sup>  ( $n_{\text{fibers}}=270$ ), *Rad51c*<sup>*dah/dah*</sup> ( $n_{\text{fibers}}=190$ ) and *Brca2* <sup>$\Delta 27/\Delta 27$</sup>  + *Rad51c*<sup>*dah/dah*</sup> ( $n_{\text{fibers}}=462$ ) fibers. *Brca2* <sup>$\Delta 27/\Delta 27$</sup>  against WT :  $p = 0.0019$ , *Brca2* <sup>$\Delta 27/\Delta 27$</sup>  + *Rad51c*<sup>*dah/dah*</sup> against WT :  $p < 0.0001$  and *Rad51c*<sup>*dah/dah*</sup> against *Brca2* <sup>$\Delta 27/\Delta 27$</sup>  + *Rad51c*<sup>*dah/dah*</sup> :  $p = 0.0023$ .

**b**, Scatter plot of DNA fiber analysis of nascent IdU tract lengths before 4mM hydroxyurea in *Brca2* <sup>$\Delta 27/\Delta 27$</sup>  + *Rad51c*<sup>*dah/dah*</sup> MAFs transfected with empty GFP vector or wild-type *Rad51c*-GFP. Experiment was performed twice and representative fiber analysis for MAFs transfected with empty GFP vector ( $n=86$ ) or wild-type *Rad51c*-GFP ( $n=64$ ) with  $p = 0.0244$  between the two groups.

**c**, Western blot of mock transfected, empty GFP vector transfected, and wild-type *Rad51c*-GFP transfected *Brca2* <sup>$\Delta 27/\Delta 27$</sup>  + *Rad51c*<sup>*dah/dah*</sup> MAFs. Experiment was performed once.

$p$ -values for DNA fiber analysis are derived using the two-tailed Mann-Whitney test, \*  $p < 0.05$ , \*\*\*  $p < 0.001$ , \*\*\*\*  $p < 0.0001$ , n.s.  $p > 0.05$ .

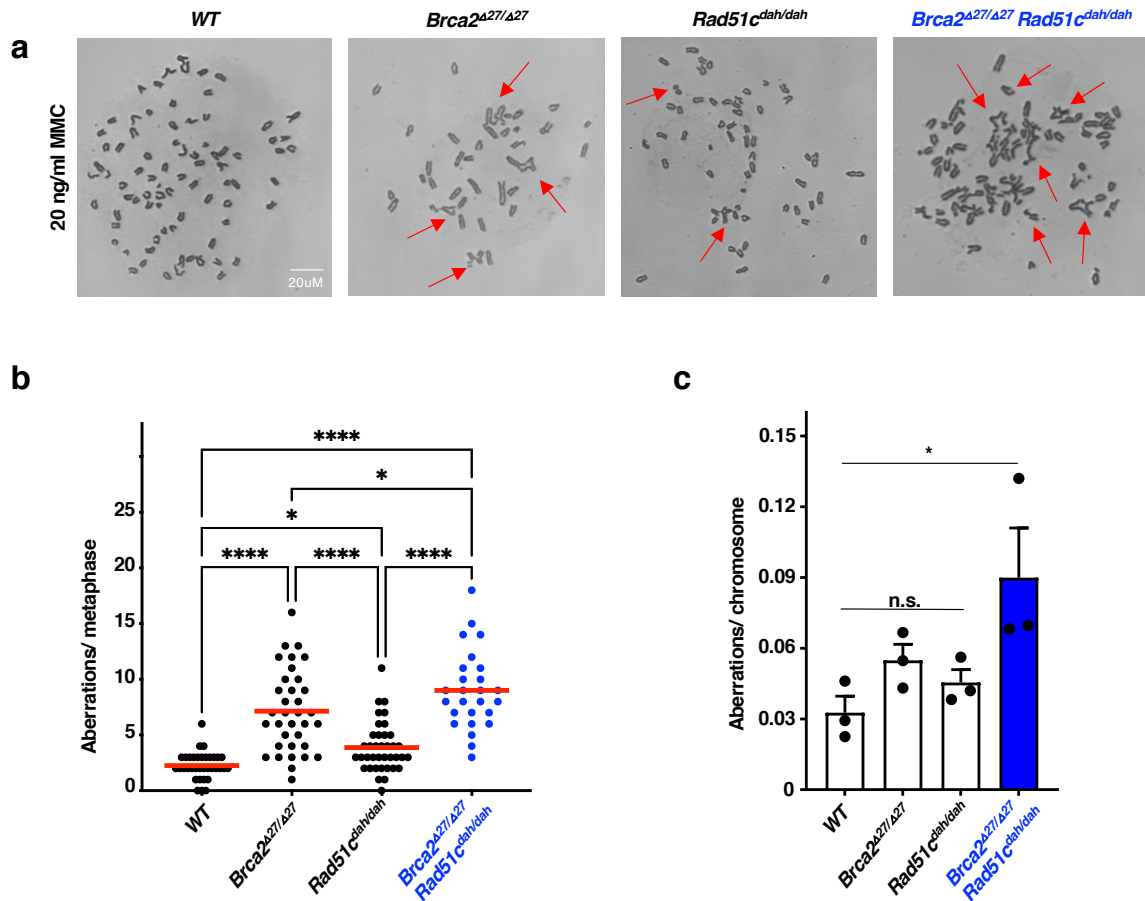

**Supplementary Fig.6. Cells with polygenic FANC mutations show increased genomic aberrations.**

**a**, Representative images of metaphase chromosome spreads in mouse adult fibroblasts (MAF) of indicated genotypes with 20 ng/ml mitomycin C (MMC). Examples for chromosomal aberrations are indicated with an arrow.

**b**, Scatter dot blot of chromosomal aberrations in metaphase spreads of MAFs after treatment with 20ng/ml MMC as indicated. Data represent 2 biologically independent experiments. In total, chromosome analysis was performed for 20ng/ml MMC treated wild-type (n=35), *Brca2*<sup>Δ27/Δ27</sup> (n=35), *Rad51c*<sup>dah/dah</sup> (n=38) and *Brca2*<sup>Δ27/Δ27</sup>+*Rad51c*<sup>dah/dah</sup> (n=25) cells. *Brca2*<sup>Δ27/Δ27</sup>+*Rad51c*<sup>dah/dah</sup> against WT and *Rad51c*<sup>dah/dah</sup>:  $p < 0.0001$ ; *Brca2*<sup>Δ27/Δ27</sup>+*Rad51c*<sup>dah/dah</sup> against *Brca2*<sup>Δ27/Δ27</sup>:  $p = 0.0268$ ; *Brca2*<sup>Δ27/Δ27</sup> against WT and *Rad51c*<sup>dah/dah</sup>:  $p < 0.0001$ ; *Rad51c*<sup>dah/dah</sup> against WT:  $p = 0.0403$

**c**, Bar graph of spontaneous chromosome aberrations per chromosome (without MMC) in metaphase spreads in MAFs. Data represent the average aberrations/chromosome of three biologically independent experiments. In total, analysis was performed for wild-type (n=50), *Brca2*<sup>Δ27/Δ27</sup> (n=52), *Rad51c*<sup>dah/dah</sup> (n=46) and *Brca2*<sup>Δ27/Δ27</sup>+*Rad51c*<sup>dah/dah</sup> (n=53) cells. *Brca2*<sup>Δ27/Δ27</sup>+*Rad51c*<sup>dah/dah</sup> against WT:  $p = 0.0379$ . Error bars represent the standard error of the mean. The data represent the mean of compiled data from biological repeats.  $p$ -values are derived using the one-way ANOVA test. \*  $p < 0.05$ , \*\*  $p < 0.01$ , \*\*\*  $p < 0.001$ , \*\*\*\*  $p < 0.0001$



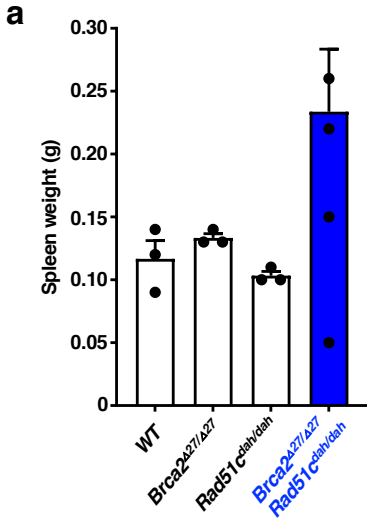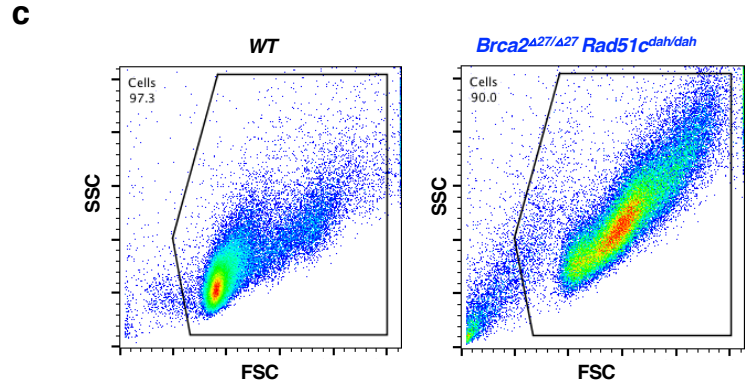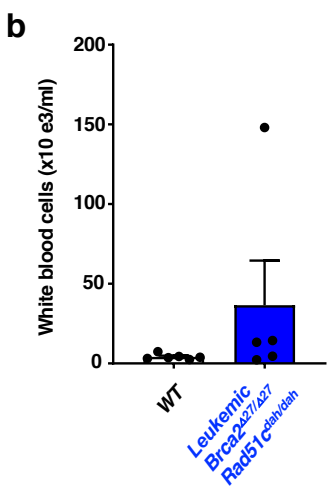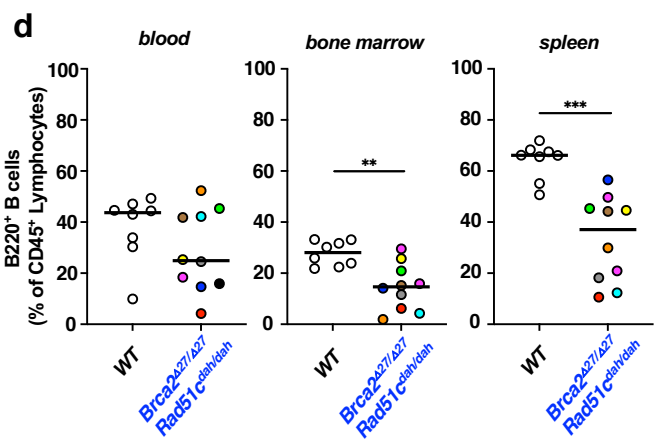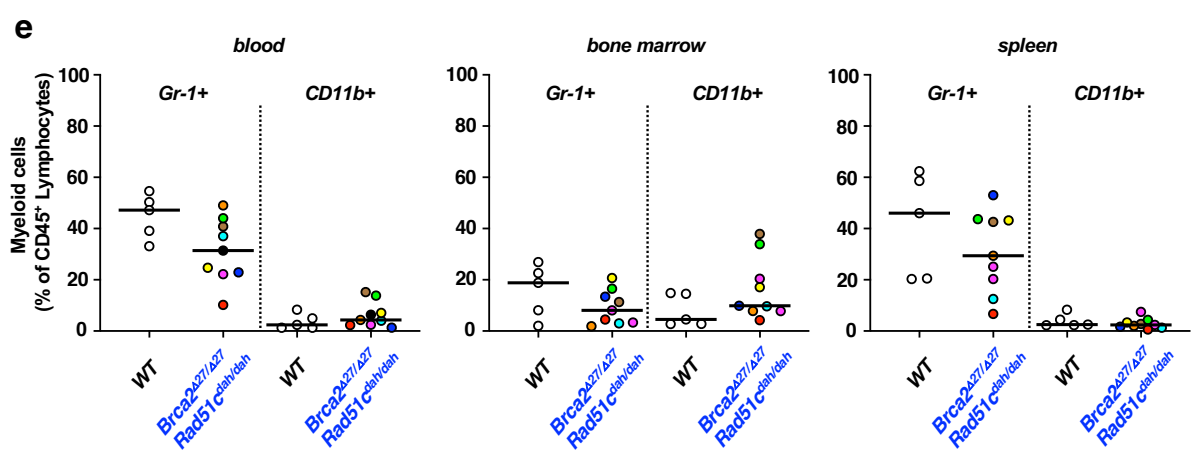

**Supplementary Fig.7. *Brca2*<sup>Δ27/Δ27</sup> + *Rad51c*<sup>dah/dah</sup> mice show abnormalities in tissues of the immune system.**

**a**, Bar-graph of enlarged spleen quantification in malade *Brca2*<sup>Δ27/Δ27</sup> + *Rad51c*<sup>dah/dah</sup> and age-matched control mice. Data represent biologically independent samples for wild-type (n=3), *Brca2*<sup>Δ27/Δ27</sup> (n=3), *Rad51c*<sup>dah/dah</sup> (n=3) and *Brca2*<sup>Δ27/Δ27</sup> + *Rad51c*<sup>dah/dah</sup> (n=5) mice.

**b**, Representative forward and side-ward scatter FACS plot image of thymus cells from WT and malade *Brca2*<sup>Δ27/Δ27</sup> + *Rad51c*<sup>dah/dah</sup> mice show enlargement of the mutant cells.

**c**, White blood cell count of leukemic *Brca2*<sup>Δ27/Δ27</sup> + *Rad51c*<sup>dah/dah</sup> mice shows increased counts compared to age-matched wild-type (WT) mice. Data represent biologically independent blood samples from wild-type (n=7) and leukemic *Brca2*<sup>Δ27/Δ27</sup> + *Rad51c*<sup>dah/dah</sup> (n=5) mice.

Error bars represent the standard error of the mean.

**d, e**, Flow cytometry analysis of blood, bone marrow and spleen cells from malade *Brca2*<sup>Δ27/Δ27</sup> + *Rad51c*<sup>dah/dah</sup> mice identifying B-Cells (**d**, B220+) or a myeloide population (**e**, Gr-1 or CD11b) as percentage of total lymphocytes (CD45+). Data represent biologically independent samples for wild-type (n=8) and *Brca2*<sup>Δ27/Δ27</sup> + *Rad51c*<sup>dah/dah</sup> (n=10) mice for identifying B-Cells (**d**, B220+). Data represent biologically independent samples for wild-type (n=5) and *Brca2*<sup>Δ27/Δ27</sup> + *Rad51c*<sup>dah/dah</sup> (n=9) mice for identifying myeloide populations (**e**, Gr-1 or CD11b). *Brca2*<sup>Δ27/Δ27</sup> + *Rad51c*<sup>dah/dah</sup> against WT for bone marrow:  $p=0.0021$ ; and for spleen  $p=0.0002$ .

$p$ -values for flow cytometry analysis are derived using the two-tailed Mann-Whitney test. \*  $p < 0.1$ , \*\*  $p < 0.01$ , \*\*\*  $p < 0.001$ , \*\*\*\*  $p < 0.0001$ .

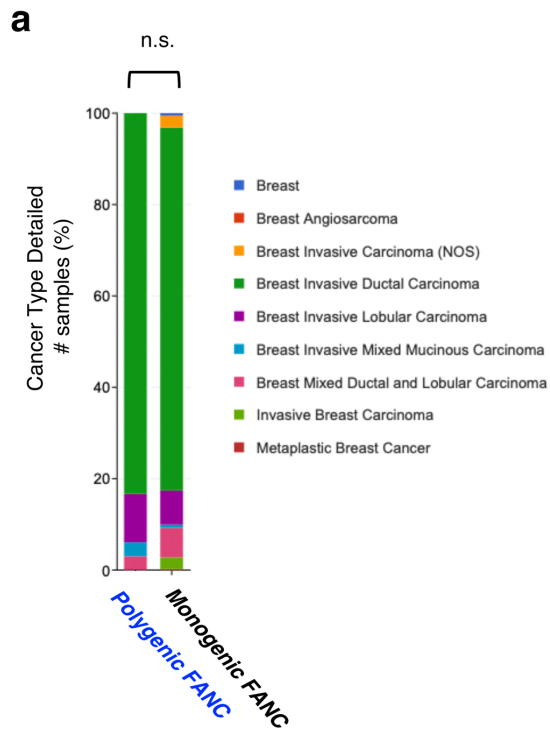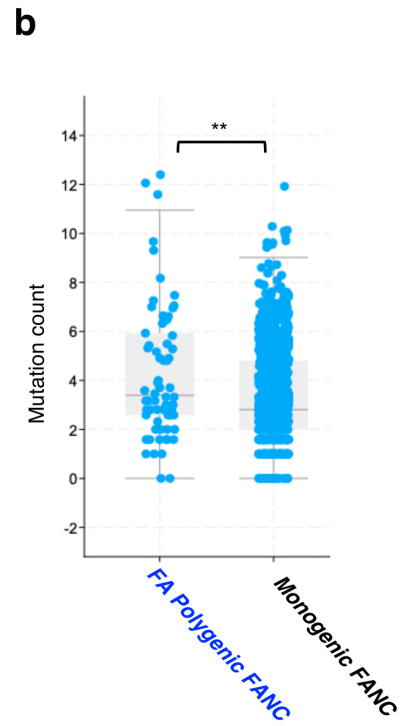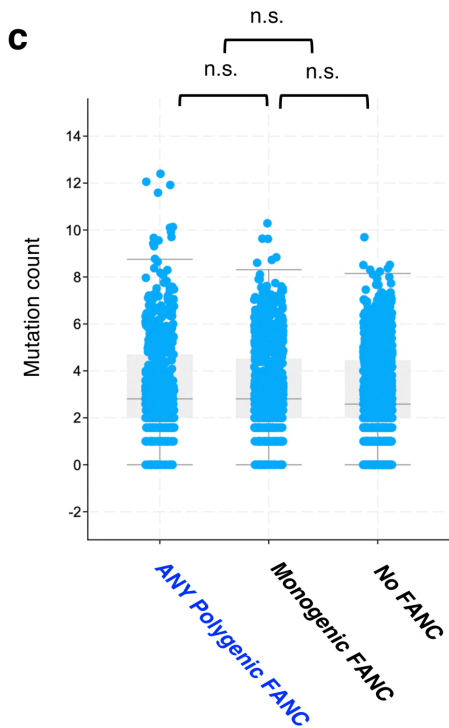

**Supplementary Fig.8. Breast cancer patients with polygenic FANC tumor mutations show increased mutagenic count.**

**a**, Bar-graph of cancer types of patients with polygenic and monogenic FANC tumor mutations ( $p=0.262$ ).  $p$ -values were derived using the two-sided Chi-squared test.

**b**, Scatter plot of mutation counts of tumor samples from 3593 patients with polygenic and monogenic FANC tumor mutations, whereby only polygenic FANC mutation combinations were considered that are found in FA patients. Box centres indicate median, boundaries represent 25th and 75th percentiles, and error bars represent maximum and minimum values.  $p$ -values were derived using the two-sided Kruskal-Wallis test,  $**p=0.014$ .

**c**, Scatter plot of mutation counts of tumor samples from 3593 patients with polygenic and monogenic FANC tumor mutations, whereby any combination of two FANC tumor mutations in the 23 FANC genes were considered as polygenic FANC mutation. Box centres indicate median, boundaries represent 25th and 75th percentiles, and error bars represent maximum and minimum values.  $p$ -values were derived using the two-sided Kruskal-Wallis test.

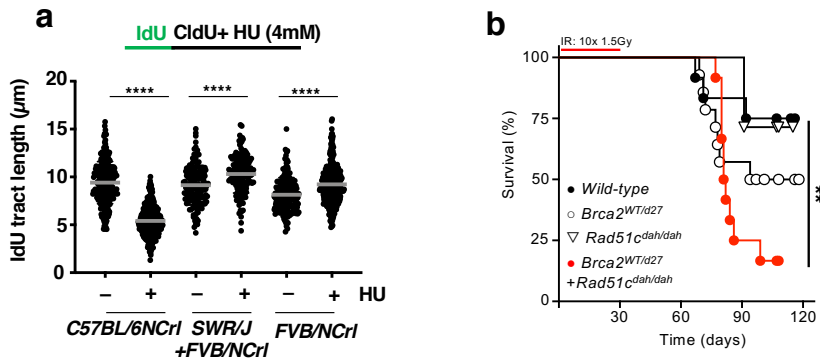

**Supplementary Fig.9. Mouse strain backgrounds vary in intrinsic fork protection defects.**

**a**, Scatter plot of DNA fiber analysis of nascent IdU tract lengths incorporated before replication stalling with high concentrations of hydroxyurea (HU, 4mM) and without, measuring DNA fork protection as the reduction of IdU tract lengths with HU in MAFs in various mouse strain backgrounds as indicated. Data represent two independent experiments. In total, fiber analysis was performed for untreated (n=245) and HU treated (282) C57BL/6NCrI MAFs, untreated (n=140) and HU treated (148) SWR/J+ FVB/NCrI mixed background MAFs and untreated (n=189) and HU treated (n=310) FVB/NCrI MAFs. *p*-values for DNA fiber analysis are derived using the two-tailed Mann-Whitney test, \*\*\*\* *p* < 0.0001 for all comparison of untreated and treated samples in each group.

**b**, Kaplan-Meier curves for overall survival of male wild-type (WT), *Brca2*<sup>WT/Δ27</sup>, *Rad51*<sup>dah/dah</sup>, and *Brca2*<sup>WT/Δ27</sup>+*Rad51*<sup>dah/dah</sup> mice after ten irradiations with 1.5 Gy daily. *Brca2*<sup>WT/Δ27</sup>+*Rad51*<sup>dah/dah</sup> against WT: *p*=0.0091. *p*-values for comparing survival of two groups are derived using the Mantel-Cox test,

**Uncropped Western blots of Supplementary Fig. 5c.**

Anti-Rad51c blot: lane 1: protein marker, lane 2: mock transfected, lane 3: mock-GFP transfected, lane 4: wild-type Rad51c-GFP transfected *Brca2*<sup>Δ27/Δ27</sup>+*Rad51c*<sup>dah/dah</sup> MAFs. Higher exposure blot to the right.

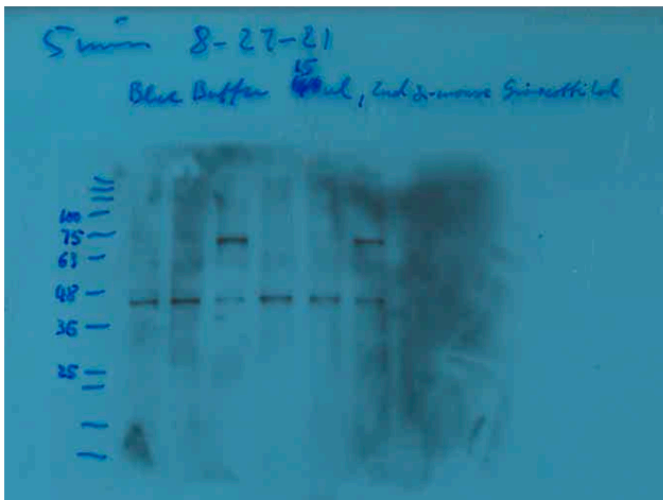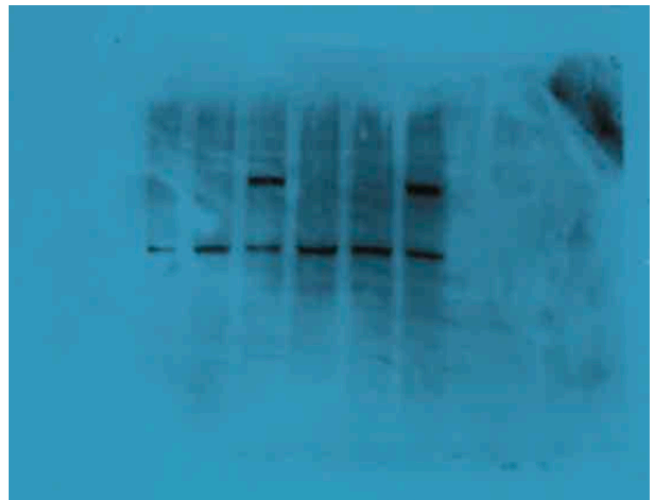

Anti- $\alpha$ -tubulin blot: lane 1: protein marker, lane 2: mock transfected, lane 3: mock-GFP transfected, lane 4: wild-type Rad51c-GFP transfected *Brca2* <sup>$\Delta$ 27/ $\Delta$ 27</sup>+*Rad51c*<sup>*dah/dah*</sup> MAFs.

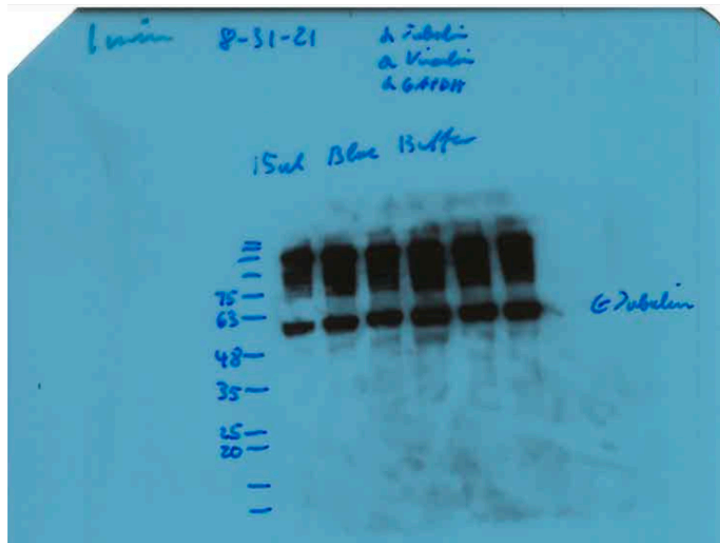

## Supplementary Tables and References

| ID      | FA Subtype | Additional FANC mutations                                                                                      | Reference |
|---------|------------|----------------------------------------------------------------------------------------------------------------|-----------|
| HSC230  | FA-B       | <b>‡</b> <i>BRCA2/FANCD1</i> c.2805_2808delAAAC, p.(Ala938Profs*21)                                            | (1)       |
| EUFA867 | FA-A       | <b>‡</b> <i>FANCM</i> c.2171C>A, p.(Ser724*);<br><i>FANCM</i> c.4222+1978_4300del, p.(fs*) [EX15del]           | (2), (3)  |
| FA4     | FA-C       | <i>BRCA2/FANCD1</i> c.951A>G, p.(N317S)                                                                        | (4)       |
| FA26    | FA-L       | <i>FANCI</i> c.3737C>T, p.(P1246L)                                                                             | (4)       |
| Fa-004  | FA-D2      | <i>BRCA2/FANCD1</i> chr13:31809499C>G (NCBI36/hg18), p.(H1003D)                                                | (5)       |
| Fa-001  | FA-A       | <i>FANCI</i> chr15:87636941A > G, missense I > V                                                               | (5)       |
| Fa-002  | FA-A       | <b>‡</b> <i>FANCB</i> chrX:14781120C > T, missense V > I;<br><b>‡</b> <i>BRCA2</i> chr13:31871012A > C, 3'-UTR | (5)       |
| Fa-003  | FA-M       | <b>‡</b> <i>BRCA2</i> chr13:31804480A > C, missense N > H                                                      | (5)       |

**Supplementary Table 1.** Previously reported *FANC* passenger mutations. Literature search of previously reported FA patients with germline *FANC* gene mutations in addition to a biallelic or hemizygous *FANC* inactivation. **‡** Denotes homozygous or biallelic additional *FANC* mutation.

| Ser.# | Subtype | <i>FANC</i> passenger Mutation (non-synonymous)                                                 |
|-------|---------|-------------------------------------------------------------------------------------------------|
| 1     | FA-A    | <i>FANCG</i> c.418C>T, p.(His140Tyr)                                                            |
| 2     | FA-F    | <i>BRCA2/FANCD1</i> c.3854del, p.(Asn1287Ilefs*6)                                               |
| 3     | FA-C    | none                                                                                            |
| 4     | FA-A    | none                                                                                            |
| 5     | FA-N    | none                                                                                            |
| 6     | FA-C    | none                                                                                            |
| 7     | FA-C    | none                                                                                            |
| 8     | FA-A    | none                                                                                            |
| 9     | FA-A    | none                                                                                            |
| 10    | FA-A    | none                                                                                            |
| 11    | FA-A    | none                                                                                            |
| 12    | FA-N    | none                                                                                            |
| 13    | FA-A    | none                                                                                            |
| 14    | FA-G    | none                                                                                            |
| 15    | FA-A    | none                                                                                            |
| 16    | FA-A    | none                                                                                            |
| 17    | FA-A    | <i>SLX4/FANCP</i> c.734C>T, p.Pro245Leu,                                                        |
| 18    | FA-A    | none                                                                                            |
| 19    | FA-A    | <i>BRCAl/FANCS</i> c.301+7G>A                                                                   |
| 20    | FA-Q    | none                                                                                            |
| 21    | FA-A    | none                                                                                            |
| 22    | FA-A    | none                                                                                            |
| 23    | FA-A    | none                                                                                            |
| 24    | FA-A    | none                                                                                            |
| 25    | FA-A    | none                                                                                            |
| 26    | FA-A    | none                                                                                            |
| 27    | FA-D2   | none                                                                                            |
| 28    | FA-C    | none                                                                                            |
| 29    | FA-A    | <i>FANCG</i> c.77A>G, p.Gln26Arg;<br><i>FANCI</i> c.1305G>A, p.(Met435Ile)                      |
| 30    | FA-G    | none                                                                                            |
| 31    | FA-M    | <i>FANCA</i> c.2151G>T, p.(Met717Ile);<br><i>RAD51C/FANCO</i> c.29T>G, p.(Met10Arg)             |
| 32    | FA-B    | <i>BRCA2/FANCD1</i> c.6725A>G, p.(Asp2242Gly);<br><i>BRCA2/FANCD1</i> c.9104A>C, p.(Tyr3035Ser) |
| 33    | FA-B    | none                                                                                            |
| 34    | FA-A    | <i>SLX4/FANCP</i> c.3334A>C, p.(Lys1112Gln)                                                     |
| 35    | FA-D2   | none                                                                                            |
| 36    | FA-A    | <i>FANCE</i> c.1099C>A, p.(Leu367Ile)                                                           |

**Supplementary Table 2.** *FANC* passenger mutations in whole-exome sequences of 36 FA patients. Whole exome sequencing of FA patient DNAs with previously diagnosed biallelic or hemizygous *FANC* inactivation (subtype) was performed and filtered for additional heterozygous non-synonymous, ACMG class 3 or higher variants in any one of the so far identified 23 *FANC* genes. Only exomes that could be re-evaluated unambiguously were used.



| Phenotype                           | <i>BRCA2</i> mutation                             | <i>RAD51C</i> mutation | Reference         |
|-------------------------------------|---------------------------------------------------|------------------------|-------------------|
| <b>*Fanconi Anemia</b>              | Hom.<br>BRCA2<br>V2466A<br>Het.<br>BRCA2<br>N372H | Het. RAD51C G264S      | (6)<br>(7)<br>(8) |
| <b>Breast cancer susceptibility</b> | Het.<br>BRCA2<br>$\Delta$ ex26                    | Het. RAD51C R258H      | (9)<br>(10)       |

**Supplementary Table 3.** Polygenic *BRCA2+RAD51C* mutations are found in a Fanconi Anemia patient and families with a history of breast cancer. BRCA2 V2466A destabilizes the protein, BRCA2 N372H is a low-penetrance variant significantly associated with an increased risk of overall cancer, RAD51C G264S is a deleterious mutation predicted by SIFT and Polygen, BRCA2  $\Delta$ ex26 (L3216L) causes C-terminal internal deletions of exon 26, RAD51C R258H is a damaging mutation found in FA and breast cancer patients.

\* The data/analyses presented in the current publication are based on the use of study data downloaded from the dbGaP web site, under phs001481.v1.p1, [https://www.ncbi.nlm.nih.gov/projects/gap/cgi-bin/study.cgi?study\\_id=phs001481.v1.p1](https://www.ncbi.nlm.nih.gov/projects/gap/cgi-bin/study.cgi?study_id=phs001481.v1.p1)

**a**

| Parental genotype                                                 |                                                                   | Offspring genotype |         |         |         |                          |
|-------------------------------------------------------------------|-------------------------------------------------------------------|--------------------|---------|---------|---------|--------------------------|
| Father                                                            | Mother                                                            | <i>Brca2</i>       | +/+     | +/d27   | d27/d27 | Statistical Significance |
|                                                                   |                                                                   | <i>Rad51c</i>      | dah/dah | dah/dah | dah/dah |                          |
| <i>Brca2</i> <sup>d27/+</sup><br><i>Rad51c</i> <sup>dah/dah</sup> | <i>Brca2</i> <sup>d27/+</sup><br><i>Rad51c</i> <sup>dah/dah</sup> | Expected frequency | 25.00%  | 50.00%  | 25.00%  | p=0.0001,<br>n=132       |
|                                                                   |                                                                   | Observed frequency | 32.58%  | 56.82%  | 10.61%  |                          |

**b**

| Parental genotype                                               |                                                                 | Offspring genotype |       |        |         |        |        |         |         |         |         |                          |
|-----------------------------------------------------------------|-----------------------------------------------------------------|--------------------|-------|--------|---------|--------|--------|---------|---------|---------|---------|--------------------------|
| Father                                                          | Mother                                                          | <i>Brca2</i>       | +/+   | +/+    | +/+     | +/d27  | +/d27  | +/d27   | d27/d27 | d27/d27 | d27/d27 | Statistical Significance |
|                                                                 |                                                                 | <i>Rad51c</i>      | +/+   | +/dah  | dah/dah | +/+    | +/dah  | dah/dah | +/+     | +/dah   | dah/dah |                          |
| <i>Brca2</i> <sup>d27/+</sup><br><i>Rad51c</i> <sup>dah/+</sup> | <i>Brca2</i> <sup>d27/+</sup><br><i>Rad51c</i> <sup>dah/+</sup> | Expected frequency | 6.25% | 12.5%  | 6.25%   | 12.5%  | 25.00% | 12.5%   | 6.25%   | 12.5%   | 6.25%   | p=0.01, n=472            |
|                                                                 |                                                                 | Observed frequency | 5.93% | 11.86% | 4.24%   | 18.01% | 29.45% | 7.42%   | 8.47%   | 11.44%  | 3.18%   |                          |

**Supplementary Table 4.** Polygenic *Brca2*<sup>Δ27/Δ27</sup> + *Rad51c*<sup>dah/dah</sup> mice are born at sub-Mendelian frequency. Observed genotypes of *Brca2*<sup>Δ27/Δ27</sup> + *Rad51c*<sup>dah/dah</sup> mice was determined by genotyping offspring of *Brca2*<sup>Δ27/WT</sup> + *Rad51c*<sup>dah/dah</sup> (**a**, top) and *Brca2*<sup>Δ27/WT</sup> + *Rad51c*<sup>dah/WT</sup> (**b**, bottom) intercross. Expected genotypes are given using Mendelian genetics. *p*-value was calculated using chi-squared test ( $\chi^2$ -test).

| Sample ID       | Gene 1 | mutation type | AA          | zygosity | CNA        | LOH | Gene 2 | Mutation type | AA          | zygosity | CNA     | LOH |
|-----------------|--------|---------------|-------------|----------|------------|-----|--------|---------------|-------------|----------|---------|-----|
| TCGA-C8-A12T-01 | BRCA1  | mut           | D1344H      | hetero   | shallowdel | yes | FANCA  | CNA           | n/a         | n/a      | DeepDel | no  |
| TCGA-C8-A12T-01 | BRCA2  | mut           | E3177Q      | hetero   | shallowdel | yes | FANCA  | CNA           | n/a         | n/a      | DeepDel | no  |
| TCGA-AN-A046-01 | BRCA2  | mut           | E3342K      | hetero   | shallowdel | yes | FANCC  | mut           | R555Q       | hetero   | diploid | no  |
| TCGA-AN-A046-01 | BRCA2  | mut           | E3342K      | hetero   | shallowdel | yes | FANCM  | mut           | S1808Y      | hetero   | diploid | no  |
| TCGA-AN-A046-01 | BRCA2  | mut           | K985I       | hetero   | shallowdel | yes | FANCC  | mut           | R555Q       | hetero   | diploid | no  |
| TCGA-AN-A046-01 | BRCA2  | mut           | K985I       | hetero   | shallowdel | yes | FANCM  | mut           | S1808Y      | hetero   | diploid | no  |
| TCGA-A8-A085-01 | BRCA2  | mut           | E260Sfs*15  | homo     | shallowdel | yes | RAD51C | cna           | n/a         | n/a      | AMP     | no  |
| TCGA-D8-A1JP-01 | BRCA2  | mut           | L1965Ffs*39 | hetero   | shallowdel | yes | FANCC  | struc var     | n/a         | n/a      | fusion  | no  |
| TCGA-D8-A27V-01 | BRCA2  | mut           | K936Nfs*24  | hetero   | shallowdel | yes | FANCC  | mut           | X511 splice | hetero   | gain    | no  |
| TCGA-D8-A27V-01 | BRCA2  | mut           | K936Nfs*24  | hetero   | shallowdel | yes | FANCC  | mut           | P482Lfs*5   | hetero   | gain    | no  |
| TCGA-A2-A0ET-01 | BRCA2  | struc var     | n/a         | n/a      | BR fusion  | no  | FANCB  | mut           | I418Nfs*18  | hetero   | diploid | no  |
| TCGA-A8-A07I-01 | BRCA2  | mut           | D1355Y      | hetero   | shallowdel | yes | RAD51C | cna           | n/a         | n/a      | AMP     | no  |
| TCGA-D8-A27G-01 | BRCA2  | mut           | E2175Q      | hetero   | diploid    | no  | RAD51C | cna           | n/a         | n/a      | AMP     | no  |
| TCGA-AC-A23H-01 | BRCA2  | mut           | D687H       | hetero   | diploid    | no  | FANCA  | mut           | D931H       | hetero   | gain    | no  |
| TCGA-AC-A23H-01 | BRCA2  | mut           | D687H       | hetero   | diploid    | no  | FANCA  | mut           | E38K        | homo     | gain    | no  |
| TCGA-AC-A23H-01 | BRCA2  | mut           | D1033H      | hetero   | diploid    | no  | FANCA  | mut           | D931H       | hetero   | gain    | no  |
| TCGA-AC-A23H-01 | BRCA2  | mut           | D1033H      | hetero   | diploid    | no  | FANCA  | mut           | E38K        | homo     | gain    | no  |
| TCGA-AC-A23H-01 | BRCA2  | mut           | D687H       | hetero   | diploid    | no  | RAD51C | mut           | D141H       | hetero   | AMP     | no  |
| TCGA-AC-A23H-01 | BRCA2  | mut           | D1033H      | hetero   | diploid    | no  | RAD51C | mut           | D141H       | hetero   | AMP     | no  |
| TCGA-AC-A23H-01 | BRCA2  | mut           | D687H       | hetero   | diploid    | no  | RAD51C | cna           | n/a         | n/a      | AMP     | no  |
| TCGA-AC-A23H-01 | BRCA2  | mut           | D1033H      | hetero   | diploid    | no  | RAD51C | cna           | n/a         | n/a      | AMP     | no  |
| TCGA-AC-A23H-01 | FANCA  | mut           | D931H       | hetero   | gain       | no  | FANCG  | mut           | E566K       | hetero   | gain    | no  |
| TCGA-AC-A23H-01 | FANCA  | mut           | E38K        | homo     | gain       | no  | FANCG  | mut           | E566K       | hetero   | gain    | no  |
| TCGA-AC-A23H-01 | FANCA  | mut           | D931H       | hetero   | gain       | no  | FANCI  | mut           | S361L       | hetero   | diploid | no  |
| TCGA-AC-A23H-01 | FANCA  | mut           | E38K        | homo     | gain       | no  | FANCI  | mut           | S361L       | hetero   | diploid | no  |
| TCGA-EW-A1PE-01 | BRCA2  | mut           | E1158Q      | hetero   | diploid    | no  | FANCD2 | mut           | E1108*      | hetero   | diploid | no  |
| TCGA-EW-A1PE-01 | BRCA2  | mut           | K1191N      | hetero   | diploid    | no  | FANCD2 | mut           | E1108*      | hetero   | diploid | no  |
| TCGA-A2-A04P-01 | BRCA2  | mut           | Q3206E      | hetero   | gain       | no  | FANCA  | cna           | n/a         | n/a      | AMP     | no  |
| TCGA-AN-A0XW-01 | BRCA2  | mut           | P527T       | hetero   | shallowdel | yes | RAD51C | struc var     | n/a         | n/a      | fusion  | no  |
| TCGA-AN-A0XW-01 | BRCA2  | mut           | P527T       | hetero   | shallowdel | yes | RAD51C | cna           | n/a         | n/a      | AMP     | no  |
| TCGA-A8-A06R-01 | BRCA2  | cna           | n/a         | n/a      | AMP        | no  | FANCB  | cna           | n/a         | n/a      | DeepDel | no  |

|                 |       |         |                               |        |               |     |        |             |                  |        |             |     |
|-----------------|-------|---------|-------------------------------|--------|---------------|-----|--------|-------------|------------------|--------|-------------|-----|
| TCGA-D8-A1J9-01 | FANCA | mut     | R52L                          | homo   | shallowdel    | yes | FANCG  | cna         | n/a              | n/a    | AMP         | no  |
| TCGA-C8-A26Y-01 | FANCA | mut     | D694Y                         | hetero | shallowdel    | yes | SLX4   | mut         | S381G            | hetero | gain        | no  |
| TCGA-A2-A04X-01 | FANCM | mut     | E1622del                      | hetero | diploid       | no  | RAD51C | cna         | n/a              | n/a    | AMP         | no  |
| TCGA-D8-A1JB-01 | BRCA2 | cna     | n/a                           | n/a    | DeepDel       | no  | FANCM  | mut         | R1684*           | hetero | diploid     | no  |
| TCGA-D8-A1JD-01 | BRCA2 | cna     | n/a                           | n/a    | DeepDel       | no  | RAD51C | mut         | P21A             | hetero | diploid     | no  |
| MB-0211         | BRCA2 | CNA     | n/a                           | n/a    | amp           | no  | RAD51C | CNA         | n/a              | n/a    | amp         | no  |
| MB-0218         | FANCM | CNA     | n/a                           | n/a    | amp           | no  | RAD51C | CNA         | n/a              | n/a    | amp         | no  |
| MB-0291         | FANCM | CNA     | n/a                           | n/a    | amp           | no  | RAD51C | CNA         | n/a              | n/a    | amp         | no  |
| MB-0313         | FANCA | CNA     | n/a                           | n/a    | deep del      | no  | FANCM  | CNA         | n/a              | n/a    | amp         | no  |
| MB-0468         | BRCA2 | CNA     | n/a                           | n/a    | amp           | no  | FANCM  | CNA         | n/a              | n/a    | amp         | no  |
| MB-0664         | BRCA2 | Mut     | C3069Lfs*5                    | n/a    | diploid       | no  | FANCA  | CNA         | n/a              | n/a    | amp         | no  |
| MB-2513         | BRCA2 | CNA     | n/a                           | n/a    | amp           | no  | FANCC  | CNA         | n/a              | n/a    | amp         | no  |
| MB-2513         | BRCA2 | CNA     | n/a                           | n/a    | amp           | no  | FANCD2 | CNA         | n/a              | n/a    | amp         | no  |
| MB-2763         | FANCA | CNA     | n/a                           | n/a    | amp           | no  | SLX4   | CNA         | n/a              | n/a    | amp         | no  |
| MB-2847         | BRCA2 | CNA,Mut | T3310Nfs*17                   | n/a    | shallow del   | yes | RAD51C | CNA         | n/a              | n/a    | amp         | no  |
| MB-3277         | BRIP1 | CNA     | n/a                           | n/a    | amp           | no  | FANCL  | CNA         | n/a              | n/a    | amp         | no  |
| MB-3396         | BRCA2 | CNA     | n/a                           | n/a    | deep del      | no  | FANCD2 | Mut         | R1299C           | n/a    | diploid     | no  |
| MB-3871         | FANCA | CNA,Mut | R212G                         | n/a    | shallow del   | yes | SLX4   | CNA         | n/a              | n/a    | amp         | no  |
| MB-4331         | FANCM | CNA     | n/a                           | n/a    | amp           | no  | RAD51C | CNA         | n/a              | n/a    | amp         | no  |
| MB-4351         | BRIP1 | CNA     | n/a                           | n/a    | amp           | no  | FANCL  | CNA         | n/a              | n/a    | amp         | no  |
| MB-4601         | BRCA2 | CNA     | n/a                           | n/a    | amp           | no  | FANCA  | CNA,<br>Mut | R714Q            | n/a    | shallow del | yes |
| MB-4828         | BRCA2 | CNA     | n/a                           | n/a    | deep del      | no  | RAD51C | CNA         | n/a              | n/a    | amp         | no  |
| MB-4938         | BRCA2 | Mut     | L2654Ffs*3                    | n/a    | diploid       | no  | RAD51C | CNA         | n/a              | n/a    | amp         | no  |
| MB-4938         | BRCA2 | Mut     | L2654Ffs*3                    | n/a    | diploid       | no  | FANCD2 | CNA,<br>Mut | X330 splice      | n/a    | gain        | no  |
| MB-4949         | FANCM | CNA     | n/a                           | n/a    | amp           | no  | RAD51C | CNA         | n/a              | n/a    | amp         | no  |
| MB-5130         | BRCA2 | Mut     | S3366Mfs*2,<br>V3365 S3366ins | n/a    | diploid       | no  | FANCM  | CNA         | n/a              | n/a    | amp         | no  |
| MB-5197         | FANCM | CNA     | n/a                           | n/a    | amp           | no  | RAD51C | CNA         | n/a              | n/a    | amp         | no  |
| MB-5275         | BRCA2 | Mut     | G4V                           | n/a    | diploid       | no  | FANCA  | Mut         | Q153*,E1420K     | n/a    | diploid     | no  |
| MB-5275         | BRCA2 | Mut     | G4V                           | n/a    | diploid       | no  | FANCD2 | Mut         | E369Q, S409L     | n/a    | diploid     | no  |
| MB-5275         | FANCA | Mut     | Q153*,E1420K                  | n/a    | diploid       | no  | FANCD2 | Mut         | E369Q, S409L     | n/a    | diploid     | no  |
| MB-5414         | FANCM | CNA     | n/a                           | n/a    | amp           | no  | RAD51C | CNA         | n/a              | n/a    | amp         | no  |
| MB-5465         | BRIP1 | CNA     | n/a                           | n/a    | amp           | no  | FANCL  | CNA         | n/a              | n/a    | amp         | no  |
| MB-5518         | BRCA2 | CNA     | n/a                           | n/a    | amp           | no  | FANCD2 | CNA         | n/a              | n/a    | amp         | no  |
| MB-5540         | FANCM | CNA     | n/a                           | n/a    | amp           | no  | RAD51C | CNA         | n/a              | n/a    | amp         | no  |
| MB-5556         | BRCA2 | CNA     | n/a                           | n/a    | deep del      | no  | RAD51C | CNA         | n/a              | n/a    | amp         | no  |
| MB-5593         | BRCA2 | Mut     | V2687I                        | n/a    | diploid       | no  | RAD51C | CNA         | n/a              | n/a    | amp         | no  |
| MB-5604         | BRCA1 | CNA     | n/a                           | n/a    | amp           | no  | FANCA  | CNA,<br>Mut | R1144W           | n/a    | shallow del | yes |
| MB-5634         | FANCA | CNA     | n/a                           | n/a    | amp           | no  | FANCG  | CNA         | n/a              | n/a    | amp         | no  |
| MB-6026         | BRCA2 | CNA     | n/a                           | n/a    | deep del      | no  | RAD51C | CNA         | n/a              | n/a    | amp         | no  |
| MB-6100         | BRCA2 | Mut     | E1514K                        | n/a    | diploid       | no  | RAD51C | CNA         | n/a              | n/a    | amp         | no  |
| MB-6100         | BRCA2 | Mut     | E1514K                        | n/a    | diploid       | no  | FANCF  | CNA         | n/a              | n/a    | amp         | no  |
| MB-6156         | BRCA2 | CNA     | n/a                           | n/a    | amp           | no  | RAD51C | CNA         | n/a              | n/a    | amp         | no  |
| MB-6178         | BRCA1 | Mut     | V452A                         | n/a    | diploid       | no  | FANCA  | Mut         | D79Y             | n/a    | diploid     | no  |
| MB-6217         | FANCA | Mut     | A152G                         | n/a    | diploid       | no  | FANCE  | CNA         | n/a              | n/a    | amp         | no  |
| MB-6329         | FANCA | Mut     | H292Q                         | n/a    | diploid       | no  | FANCM  | CNA         | n/a              | n/a    | amp         | no  |
| MB-7028         | FANCM | CNA     | n/a                           | n/a    | amp           | no  | RAD51C | CNA         | n/a              | n/a    | amp         | no  |
| MB-7186         | FANCA | CNA     | n/a                           | n/a    | deep del      | no  | SLX4   | CNA         | n/a              | n/a    | amp         | no  |
| MB-7299         | FANCA | Mut     | D598E                         | n/a    | diploid       | no  | FANCM  | CNA         | n/a              | n/a    | amp         | no  |
| MTS-T0697       | BRCA2 | CNA,Mut | Q3036*                        | n/a    | shallow del   | yes | RAD51C | CNA         | n/a              | n/a    | amp         | no  |
| MTS-T2118       | BRCA2 | Mut     | T2662M                        | n/a    | not available | no  | FANCD2 | Mut         | E719G            | n/a    | n/a         | no  |
| MTS-T2398       | BRCA1 | CNA     | n/a                           | n/a    | amp           | no  | FANCA  | Mut         | H544Q,<br>P1392S | n/a    | n/a         | no  |
| MB-5556         | BRCA2 | CNA     | n/a                           | n/a    | deep del      | no  | RAD51C | CNA         | n/a              | n/a    | amp         | no  |

**Supplementary Table 5.** Individual mutation data as defined by cBioportal.com of breast cancer patient with tumors containing polygenic FANC mutations in the sixteen FANC combinations determined in Supplementary Table 1 and 2. Deep del denotes deep deletions, shallow del denotes shallow deletions, Amp denotes amplifications, CNA denotes copy number aberration, Mut denotes mutation. Hetero/homozygosity and LOH were inferred from allele frequency and CNA.

### Supplementary References

1. N. G. Howlett *et al.*, Biallelic inactivation of BRCA2 in Fanconi anemia. *Science* **297**, 606-609 (2002).
2. A. R. Meetei *et al.*, A human ortholog of archaeal DNA repair protein Hef is defective in Fanconi anemia complementation group M. *Nat Genet* **37**, 958-963 (2005).
3. T. R. Singh *et al.*, Impaired FANCD2 monoubiquitination and hypersensitivity to camptothecin uniquely characterize Fanconi anemia complementation group M. *Blood* **114**, 174-180 (2009).
4. S. C. Chandrasekharappa *et al.*, Massively parallel sequencing, aCGH, and RNA-Seq technologies provide a comprehensive molecular diagnosis of Fanconi anemia. *Blood* **121**, e138-148 (2013).
5. L. Chang *et al.*, Whole exome sequencing reveals concomitant mutations of multiple FA genes in individual Fanconi anemia patients. *BMC Med Genomics* **7**, 24 (2014).
6. W. Q. Xue *et al.*, Association of BRCA2 N372H polymorphism with cancer susceptibility: a comprehensive review and meta-analysis. *Scientific reports* **4**, 6791 (2014).
7. G. Cecener *et al.*, BRCA1/2 germline mutations and their clinical importance in Turkish breast cancer patients. *Cancer Invest* **32**, 375-387 (2014).
8. L.-H. Yan, F.-H. Sun, Y. Wang, Relationship of BRCA2 N372H polymorphism and risk of cancer: a systematic meta-analysis under PRISMA guidelines. *Int J Clin Exp Med* **11**, 10326-10335 (2018).
9. L. B. Ahlborn *et al.*, Identification of a breast cancer family double heterozygote for RAD51C and BRCA2 gene mutations. *Familial cancer* **14**, 129-133 (2015).
10. A. Meindl *et al.*, Germline mutations in breast and ovarian cancer pedigrees establish RAD51C as a human cancer susceptibility gene. *Nat Genet* **42**, 410-414 (2010).
